# Supplementary material for: Validation of Cell-Free RNA and Circulating Tumor Cells for Molecular Marker Analysis in Metastatic Prostate Cancer
Source: MDPI journal article supplement (doi:10.3390/biomedicines9081004), 2021-08-12
Supplement: s1 [file s1]

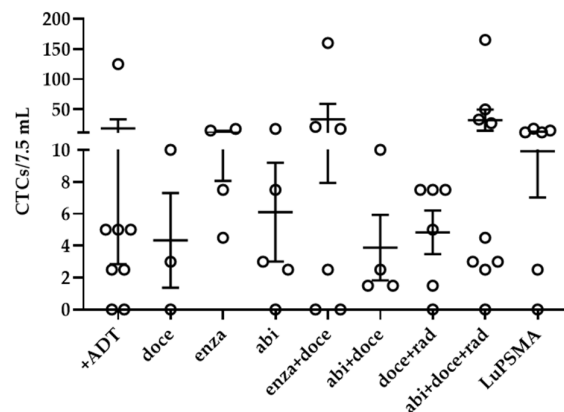

**Supplementary Figure 1. CTC count in mPCa patients with different prior therapies**, including androgen deprivation therapy (ADT), docetaxel (doce), enzalutamide (enza), abiraterone acetate (abi), radium-223 (rad), and Lutetium<sup>177</sup>-PSMA- therapy (LuPSMA). Blood was enriched with ScreenCell or Parsortix<sup>TM</sup> and counted when positive for PSMA and/or panCK and negative for CD45. Mean values with SEM are shown.
